# Supplementary material for: UHPLC-ESI-QTOF-MS/MS profiling of saponins and tyrosinase inhibitory activity of Ilex cochinchinensis , Ilex annamensis , and Ilex rotunda leaves from Vietnam
Source: Royal Society of Chemistry journal article supplement (doi:10.1039/d5ra05096k), 2025-01-01
Supplement: d5ra05096k1.pdf [file d5ra05096k1.pdf]

MS and MS/MS spectra of compounds 9, 15, and 46 in *Ilex cochinchinensis* (ICL) in negative ESI mode.

| compound No. | RT    | m/z      | MS spectrum                                                                                                                                                                                      | MS/MS spectrum                                                                                                                                                                                                                                                                                                                   |
|--------------|-------|----------|--------------------------------------------------------------------------------------------------------------------------------------------------------------------------------------------------|----------------------------------------------------------------------------------------------------------------------------------------------------------------------------------------------------------------------------------------------------------------------------------------------------------------------------------|
| 9            | 11.83 | 959.5243 | <p>Spectrum from ICL_DEREP NEG.wiff2 (sample 1) - LA BUI NAM BO_DEREP NEG, Experiment ...1.831 min, noise</p> 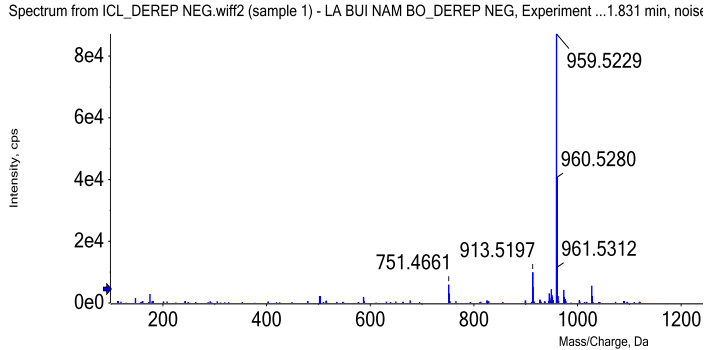 | <p>Spectrum from ICL_DEREP NEG.wiff2 (sample 1) - LA BUI NAM BO_D... NEG, Experiment 7, -IDA TOF MSMS (50 - 2000) from 11.842 min<br/>Precursor: 959.5 Da, +1, noise filtered (noise multiplier = 1.5), Gaussian smoothed (0.5 points).</p>  |

|    |       |          |                                                                                                                                                                                                                                                                                                                                                                                 |                                                                                                                                                                                                                                                                                                                                                                                                                                                                                                                                                                                                                                                                                                                |
|----|-------|----------|---------------------------------------------------------------------------------------------------------------------------------------------------------------------------------------------------------------------------------------------------------------------------------------------------------------------------------------------------------------------------------|----------------------------------------------------------------------------------------------------------------------------------------------------------------------------------------------------------------------------------------------------------------------------------------------------------------------------------------------------------------------------------------------------------------------------------------------------------------------------------------------------------------------------------------------------------------------------------------------------------------------------------------------------------------------------------------------------------------|
| 15 | 12.09 | 813.4647 | <p>Spectrum from ICL_DEREP NEG.wiff2 (sample 1) - LA BUI NAM BO_DEREP NEG, Experiment ...2.090 min, noise f</p> 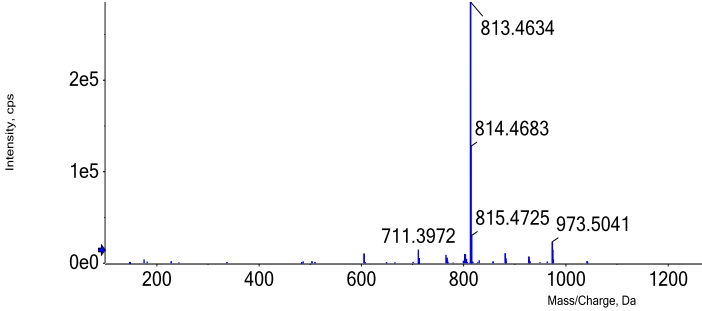 <p>Intensity, cps</p> <p>Mass/Charge, Da</p> <p>813.4634</p> <p>814.4683</p> <p>711.3972</p> <p>815.4725</p> <p>973.5041</p>                                                 | <p>Spectrum from ICL_DEREP NEG.wiff2 (sample 1) - LA BUI NAM BO_DEREP NEG, Experiment 5, -IDA TOF MSMS (50 - 2000) from 12.097 min<br/>Precursor: 813.5 Da, +1, noise filtered (noise multiplier = 1.5), Gaussian smoothed (0.5 points).</p>  <p>Intensity, cps</p> <p>Mass/Charge, Da</p> <p>605.4023</p> <p>606.4075</p> <p>119.0416</p> <p>207.0581</p> <p>606.4701</p> <p>647.4173</p> <p>689.4294</p> <p>767.4548</p>                                                                                                                                                                                                  |
| 46 | 13.71 | 941.5124 | <p>Spectrum from ICL_DEREP NEG.wiff2 (sample 1) - LA BUI NAM BO_DEREP NEG, Experiment ...3.709 min, noise</p>  <p>Intensity, cps</p> <p>Mass/Charge, Da</p> <p>941.5117</p> <p>942.5163</p> <p>895.5059</p> <p>733.4534</p> <p>896.5105</p> <p>943.5213</p> <p>1009.5022</p> <p>503.3373</p> | <p>Spectrum from ICL_DEREP NEG.wiff2 (sample 1) - LA BUI NAM BO_DEREP NEG, Experiment 8, -IDA TOF MSMS (50 - 2000) from 13.722 min<br/>Precursor: 941.5 Da, +1, noise filtered (noise multiplier = 1.5), Gaussian smoothed (0.5 points).</p>  <p>Intensity, cps</p> <p>Mass/Charge, Da</p> <p>734.4515</p> <p>733.4483</p> <p>895.5015</p> <p>896.5061</p> <p>775.4610</p> <p>776.4668</p> <p>815.4846</p> <p>735.4596</p> <p>161.0415</p> <p>207.0473</p> <p>587.3943</p> <p>601.4106</p> <p>605.8069</p> <p>629.4039</p> <p>630.4102</p> <p>455.3523</p> <p>469.3642</p> <p>470.7931</p> <p>475.2473</p> <p>481.8228</p> |

MS and MS/MS spectra of compounds 9, 15, and 46 in *Ilex cochinchinensis* (ICL) in positive ESI mode.

| compo und No. | RT    | m/z      | MS spectrum                                                                                                                                                                                          | MS/MS spectrum                                                                                                                                                                                                                                                                                                                            |
|---------------|-------|----------|------------------------------------------------------------------------------------------------------------------------------------------------------------------------------------------------------|-------------------------------------------------------------------------------------------------------------------------------------------------------------------------------------------------------------------------------------------------------------------------------------------------------------------------------------------|
| 9             | 11.83 | 932.5582 | <p>Spectrum from ICL_DEREP POS.wiff2 (sample 1) - LA BUI NAM BO_DEREP POS, Experiment ...1.416 min, noise fi</p> 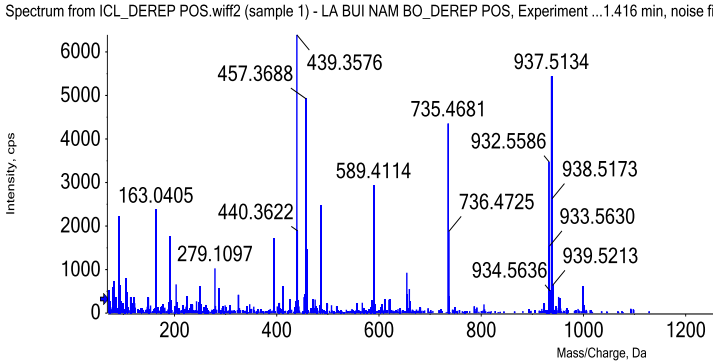 | <p>Spectrum from ICL_DEREP POS.wiff2 (sample 1) - LA BUI NAM BO_D... POS, Experiment 8, +IDA TOF MSMS (50 - 2000) from 11.943 min<br/>Precursor: 932.5 Da, +1, CE: 35.0, noise filtered (noise multiplier = 1.5), Gaussian smoothed (0.5 points)</p>  |

|    |       |          |                                                                                                                                                                   |                                                                                                                                                                                                                                                                                                    |
|----|-------|----------|-------------------------------------------------------------------------------------------------------------------------------------------------------------------|----------------------------------------------------------------------------------------------------------------------------------------------------------------------------------------------------------------------------------------------------------------------------------------------------|
| 15 | 12.09 | 786.4983 | <p>Spectrum from ICL_DEREP.POS.wiff2 (sample 1) - LA BUI NAM BO_DEREP.POS, Experiment ...1.693 min, noise filter</p> <p>Intensity, cps</p> <p>Mass/Charge, Da</p> | <p>Spectrum from ICL_DEREP.POS.wiff2 (sample 1) - LA BUI NAM BO_DEREP.POS, Experiment 3, +IDA TOF MSMS (50 - 2000) from 11.735 min<br/>Precursor: 786.5 Da, +1, CE: 35.0, noise filtered (noise multiplier = 1.5), Gaussian smoothed (0.5 points)</p> <p>Intensity, cps</p> <p>Mass/Charge, Da</p> |
| 46 | 13.71 | 914.5482 | <p>Spectrum from ICL_DEREP.POS.wiff2 (sample 1) - LA BUI NAM BO_DEREP.POS, Experiment ...3.385 min, noise fil</p> <p>Intensity, cps</p> <p>Mass/Charge, Da</p>    | <p>Spectrum from ICL_DEREP.POS.wiff2 (sample 1) - LA BUI NAM BO_DEREP.POS, Experiment 6, +IDA TOF MSMS (50 - 2000) from 13.425 min<br/>Precursor: 914.5 Da, +1, CE: 35.0, noise filtered (noise multiplier = 1.5), Gaussian smoothed (0.5 points)</p> <p>Intensity, cps</p> <p>Mass/Charge, Da</p> |

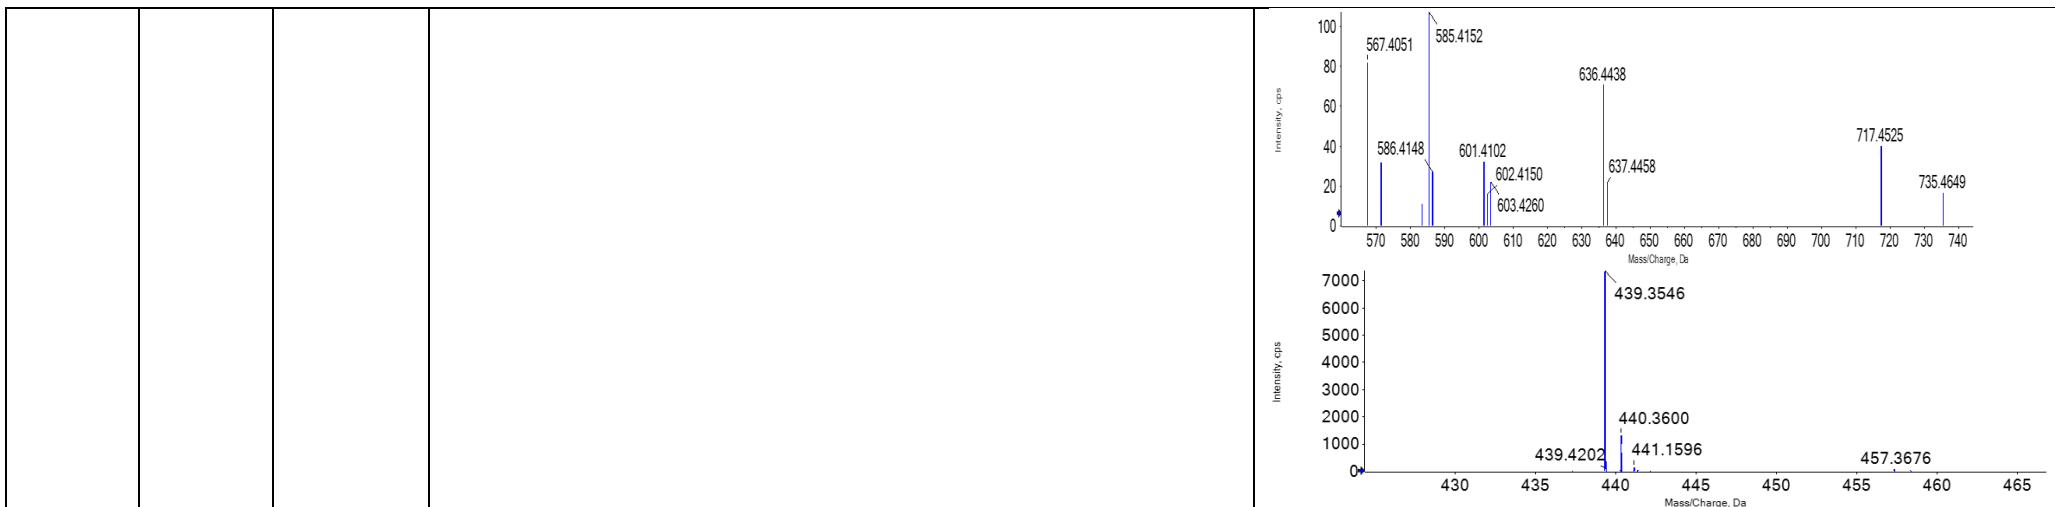

MS and MS/MS spectra of compound 46 in *Ilex annamensis* (IAL) in negative ESI mode.

| compound No. | RT    | m/z      | MS spectrum                                                                                                                                                                                                                                                  | MS/MS spectrum                                                                                                                                                                                                                                                                                                             |
|--------------|-------|----------|--------------------------------------------------------------------------------------------------------------------------------------------------------------------------------------------------------------------------------------------------------------|----------------------------------------------------------------------------------------------------------------------------------------------------------------------------------------------------------------------------------------------------------------------------------------------------------------------------|
| 46           | 13.71 | 941.5124 | <p>Spectrum from IAL_DEREP NEG.wif2 (sample 1) - LA BUI TRUNG BO...NEG, Experime...3.883 min, noise filtered (noise multiplier = 1.5), Gaussian smoothed (0.5 points)</p> 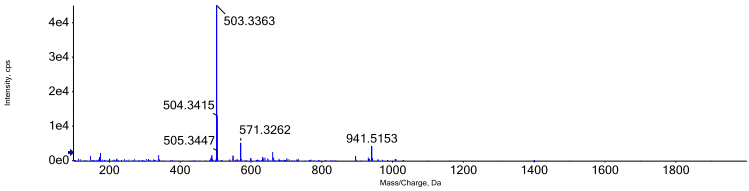 | <p>Spectrum from IAL_DEREP NEG.wif2 (sample 1) - LA BUI TRUNG BO...NEG, Experiment 10, -IDA TOF MSMS (50 - 2000) from 13.900 min Precursor: 941.5 Da, +1, noise filtered (noise multiplier = 1.5), Gaussian smoothed (0.5 points)</p>  |

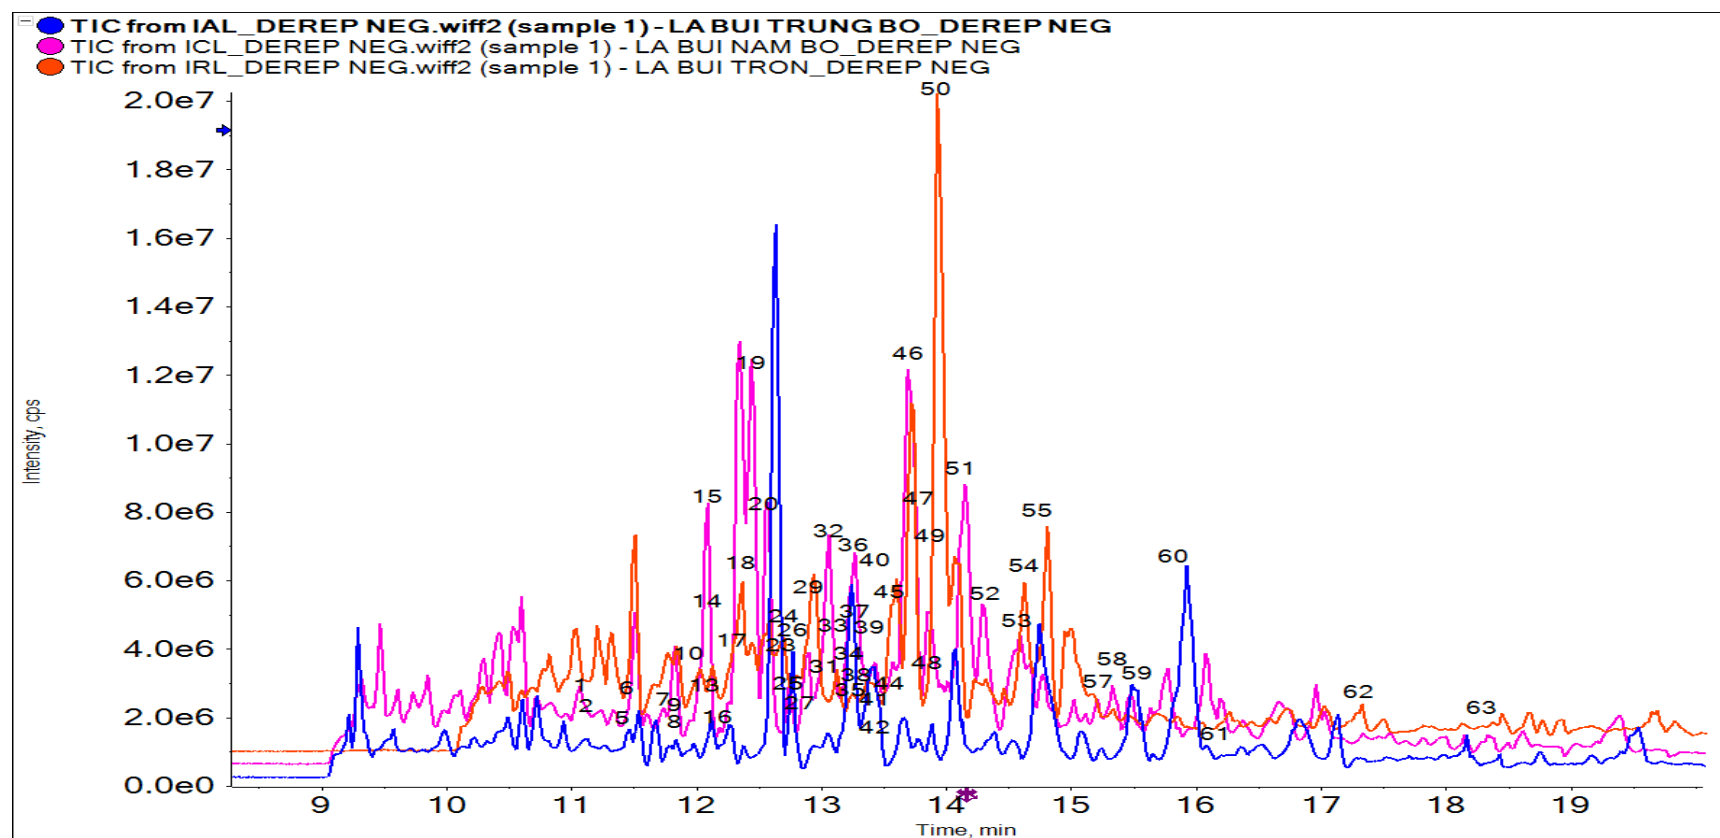

Figure S1: Overlaid TICs of the leaves extracts of *Ilex cochinchinensis* (ICL), *Ilex annamensis* (IAL), and *Ilex rotunda* (IRL) in negative ESI mode.

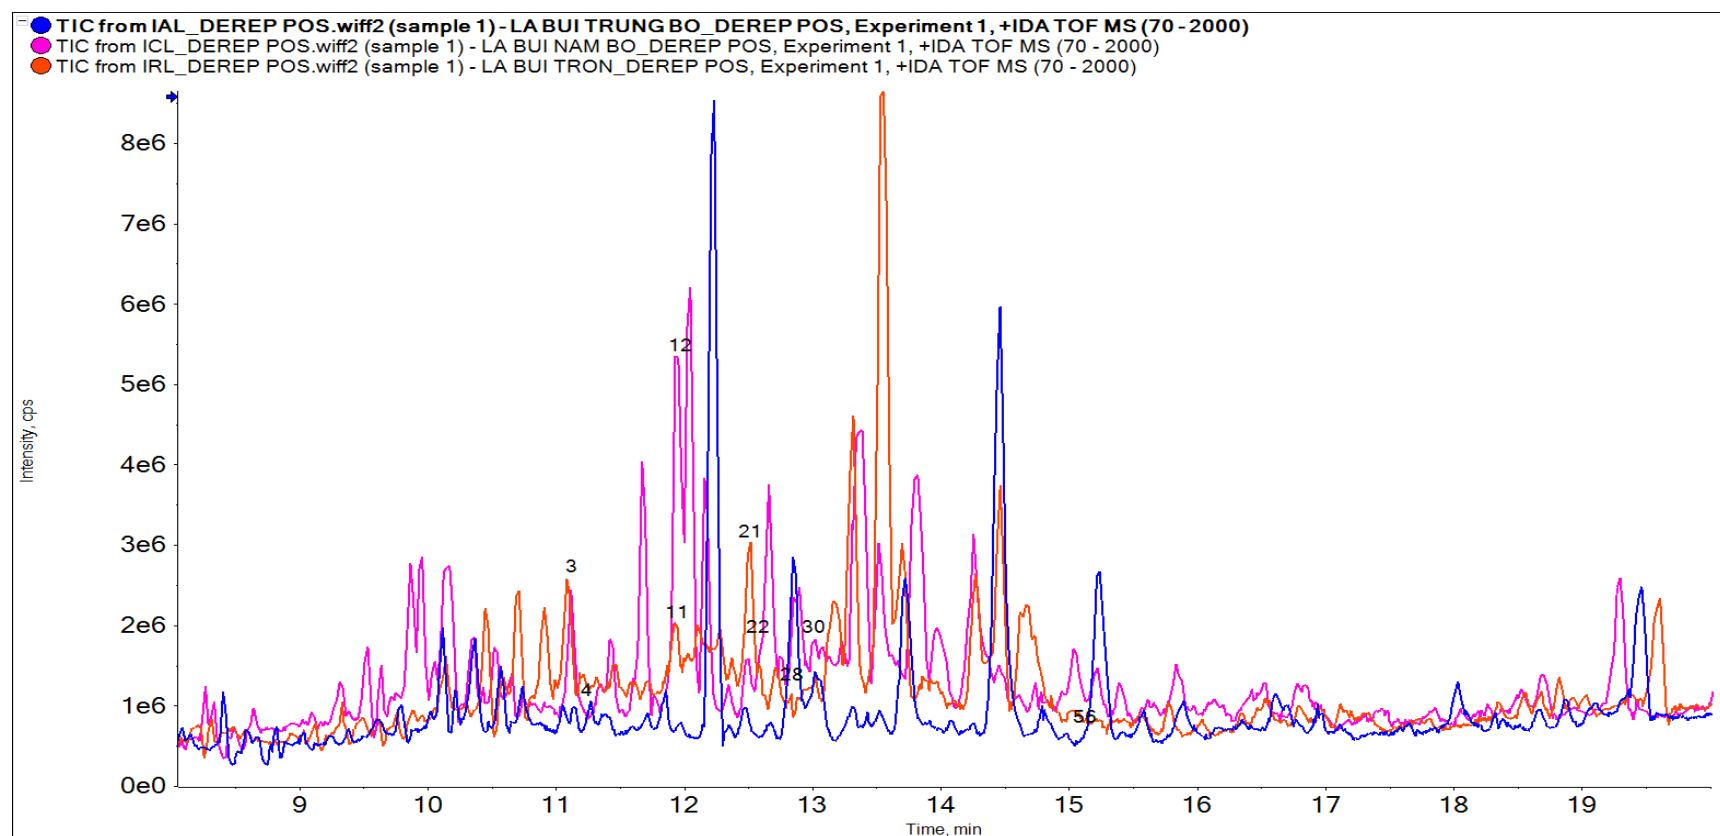

Figure S2: Overlaid TICs of the leaves extracts of *Ilex cochinchinensis* (ICL), *Ilex annamensis* (IAL), and *Ilex rotunda* (IRL) in positive ESI mode.
